# Supplementary material
Source: Springer Nature journal article supplement (https://www.springermedizin.de/resource/supplementary/13020_2010_91_MOESM4_ESM.pdf/9640958)
Supplement: MOESM4 [file 9640958]

## EST, PM values before EA (X)

|      | 1 | 2 | 3  | 4 | 5 | 6 | 7 | Freq      |
|------|---|---|----|---|---|---|---|-----------|
| 7    |   |   |    |   |   | 1 |   | 1         |
| 6    |   |   |    |   |   |   |   | 0         |
| 5    |   |   |    | 2 | 2 |   |   | 4         |
| 4    |   |   |    | 6 |   |   |   | 6         |
| 3    |   |   | 9  |   |   |   |   | 9         |
| 2    |   |   | 1  |   |   |   |   | 1         |
| 1    | 1 |   |    |   |   |   |   | 1         |
| Freq | 1 | 0 | 10 | 8 | 2 | 1 | 0 | <b>22</b> |
